# Supplementary material for: Análisis del peso específico y porosidad de materiales porosos mediante picnometría de helio
Source: JCI journal article supplement (doi:10.1172/jci134816), 2008-01-01
Supplement: sd1 [file 1]

## Supplemental Information

### **Astrocyte-microglia interaction drives evolving neuromyelitis optica lesion**

Tingjun Chen<sup>1</sup>, Vanda A. Lennon<sup>1,2</sup>, Yong U. Liu<sup>1</sup>, Dale B. Bosco<sup>1</sup>, Yujiao Li<sup>1</sup>,  
Min-Hee Yi<sup>1</sup>, Jia Zhu<sup>1</sup>, Shihui Wei<sup>3</sup> and Long-Jun Wu<sup>1,2,4\*</sup>

<sup>1</sup>Department of Neurology, Mayo Clinic, Rochester, MN, 55905, USA

<sup>2</sup>Departments of Immunology and Laboratory Medicine/Pathology, Mayo Clinic,  
Rochester, MN, 55905, USA

<sup>3</sup> Department of Ophthalmology, Chinese PLA General Hospital, Beijing, 100853, China

<sup>4</sup> Department of Neuroscience, Mayo Clinic, Jacksonville, FL, 32224, USA

#### **\*Correspondence:**

*Dr. Long-Jun Wu*

Department of Neurology,

Mayo Clinic

200 First Street SW,

Rochester, MN 55905

TEL: (617) 943-7822

E-MAIL: [wu.longjun@mayo.edu](mailto:wu.longjun@mayo.edu)

#### **Supplementary Figures and Figure Legends**

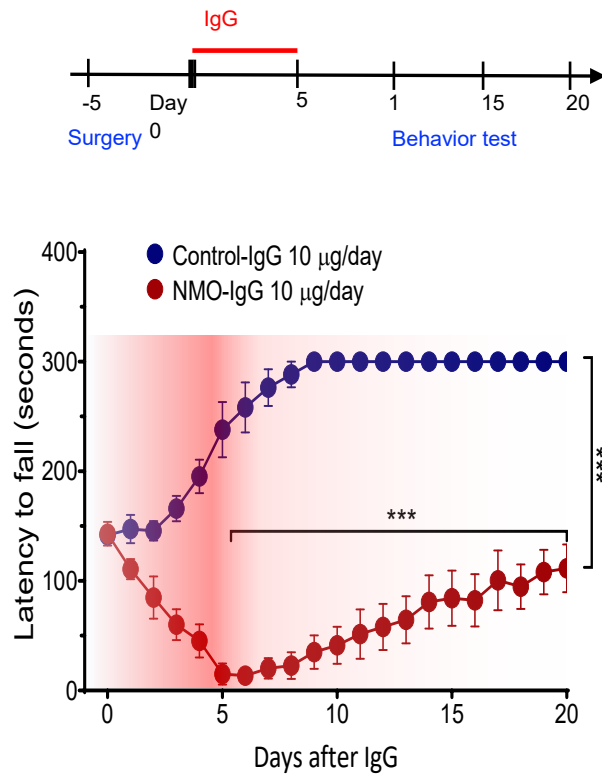

**Figure S1. Early motor impairment induced by intrathecal infusion of NMO-IgG without exogenous complement is partially reversible.**

(Upper) Timeline of experimental design. Rotarod tests show time-dependent motor impairment (measured as fall latency) resulting from 5 days' infusion of NMO-IgG, and motor function recovery upon cessation of IgG infusion. Data represent mean  $\pm$  SEM,  $n = 4$  in NMO-IgG and  $n = 3$  in Control-IgG groups, Two-way ANOVA (NMO-IgG *vs.* control-IgG) and 2-tailed student's *t*-test (day 5 *vs.* day 20 in NMO-IgG group).\*\*\*  $P < 0.001$ .

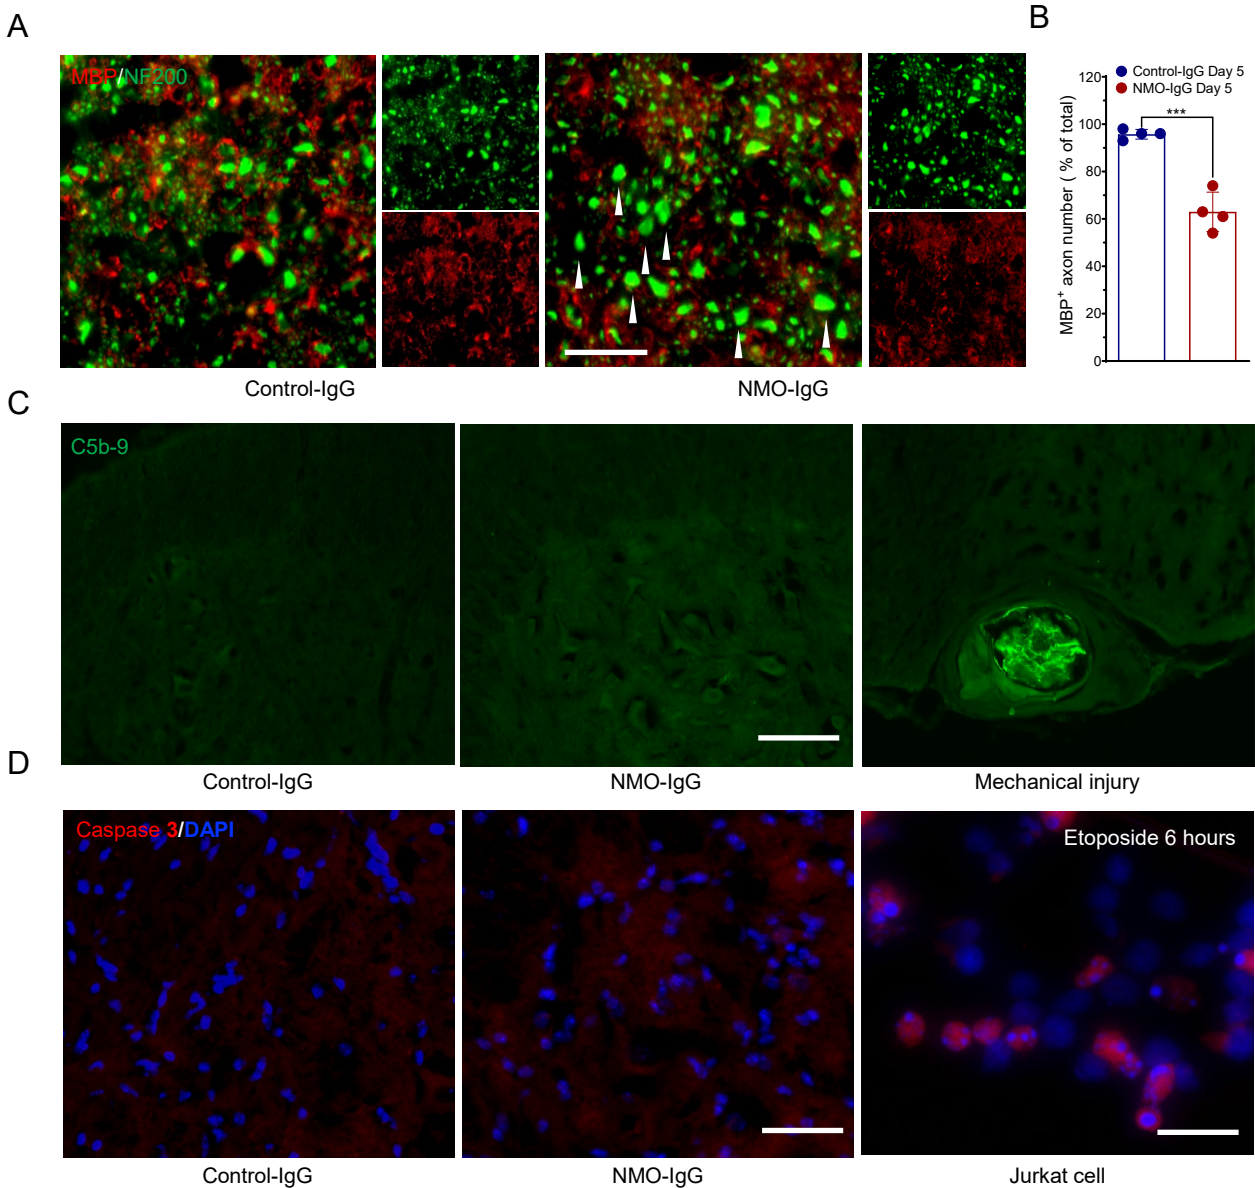

**Figure S2. NMO-IgG infusion induces minor loss of myelin basic protein immunoreactivity without evidence of axonal damage, complement-mediated cell lysis or apoptosis.**

(A) Representative spinal L4 cross sections show immunoreactivities of axoplasm (NF200, green) and myelin (MBP, red) on day 5 of IgG infusion (control or NMO),  $n = 4$  mice (4 sections/mouse) in each group. Scale bar, 5  $\mu\text{m}$ . (B) Bar graph shows relative

percentage of axon (NF200+) covered by MBP, which is significantly reduced in NMO-IgG recipients compared with control-IgG recipients,  $n = 4$  mice (4 sections/mouse). (C) Representative spinal L4 cross sections show lack of the cytolytic membrane attack complex (C5b-9 immunoreactivity) in mice infused with either control-IgG (left) or NMO-IgG (middle); mechanically-injured mouse spinal cord (right) served as positive control for C5b-9 immunostaining,  $n = 4$  mice (4 sections/mouse) in each group. Scale bar, 20  $\mu\text{m}$ . (D) Representative spinal L4 cross sections lack cleaved Caspase 3 immunoreactivity (apoptosis marker) in mice infused with either control-IgG (left) or NMO-IgG (middle),  $n = 4$  mice (4 sections/mouse) for each group. Scale bar, 20  $\mu\text{m}$ ; Jurkat cells treated with 40 mg/ml etoposide, 6 hours (right), served as positive control for Caspase 3 immunostaining, Scale bar, 10  $\mu\text{m}$ . Data represent mean  $\pm$  SEM. 2-tailed student's  $t$ -test (B). \*\*\*  $P < 0.001$ .

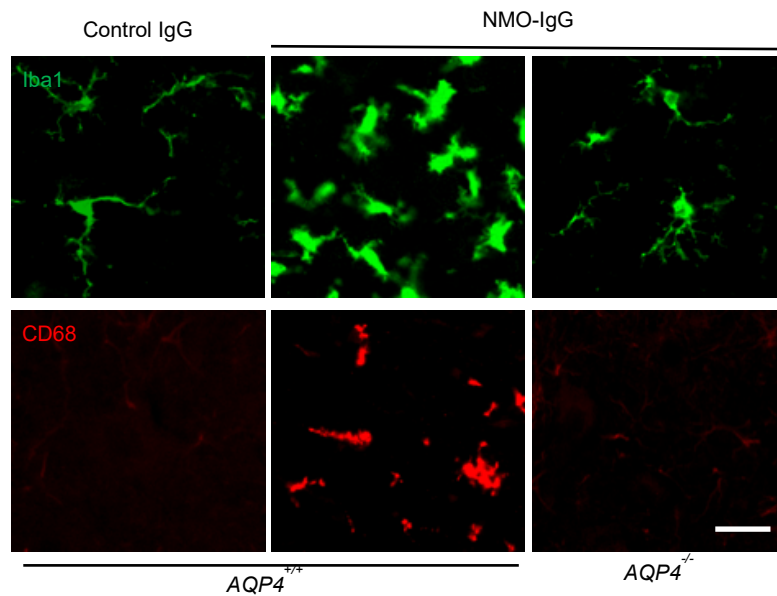

**Figure S3. Microglial activation in NMO-IgG recipient mice is AQP4-dependent.**

Lysosomal CD68 (red, lower) in Iba1+ microglia (green, upper) was upregulated in L4 spinal cord of wild-type (*Aqp4*<sup>+/+</sup>) mice, but not in AQP4-null mice, on day 5 of NMO-IgG infusion. Wild-type recipients of control-IgG had low CD68 is expression, n = 5 mice (4 sections/mouse). Scale bar, 20  $\mu$ m.

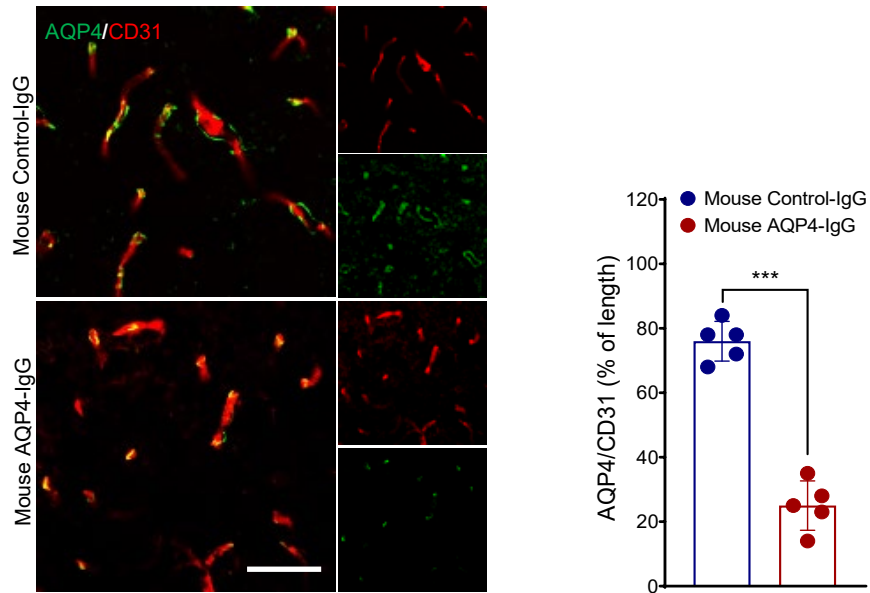

**Figure S4. Mouse monoclonal AQP4-IgG induces AQP4 loss.**

Representative spinal L4 cross sections show immunoreactivities of astrocytic AQP4 (green) and endothelial CD31 (red) on day 5 of mouse control-IgG infusion (upper) or monoclonal AQP4-IgG (lower). Scale bar, 20  $\mu$ m. Bar graph shows quantitatively that relative length of AQP4-coverage of parenchymal blood vessels (CD31+) is significantly less in mouse AQP4-IgG recipient mice than in control-IgG recipients.  $n = 5$  mice (4 sections/mouse). Data represent mean  $\pm$  SEM, 2-tailed student's  $t$ -test. \*\*\*  $P < 0.001$ .

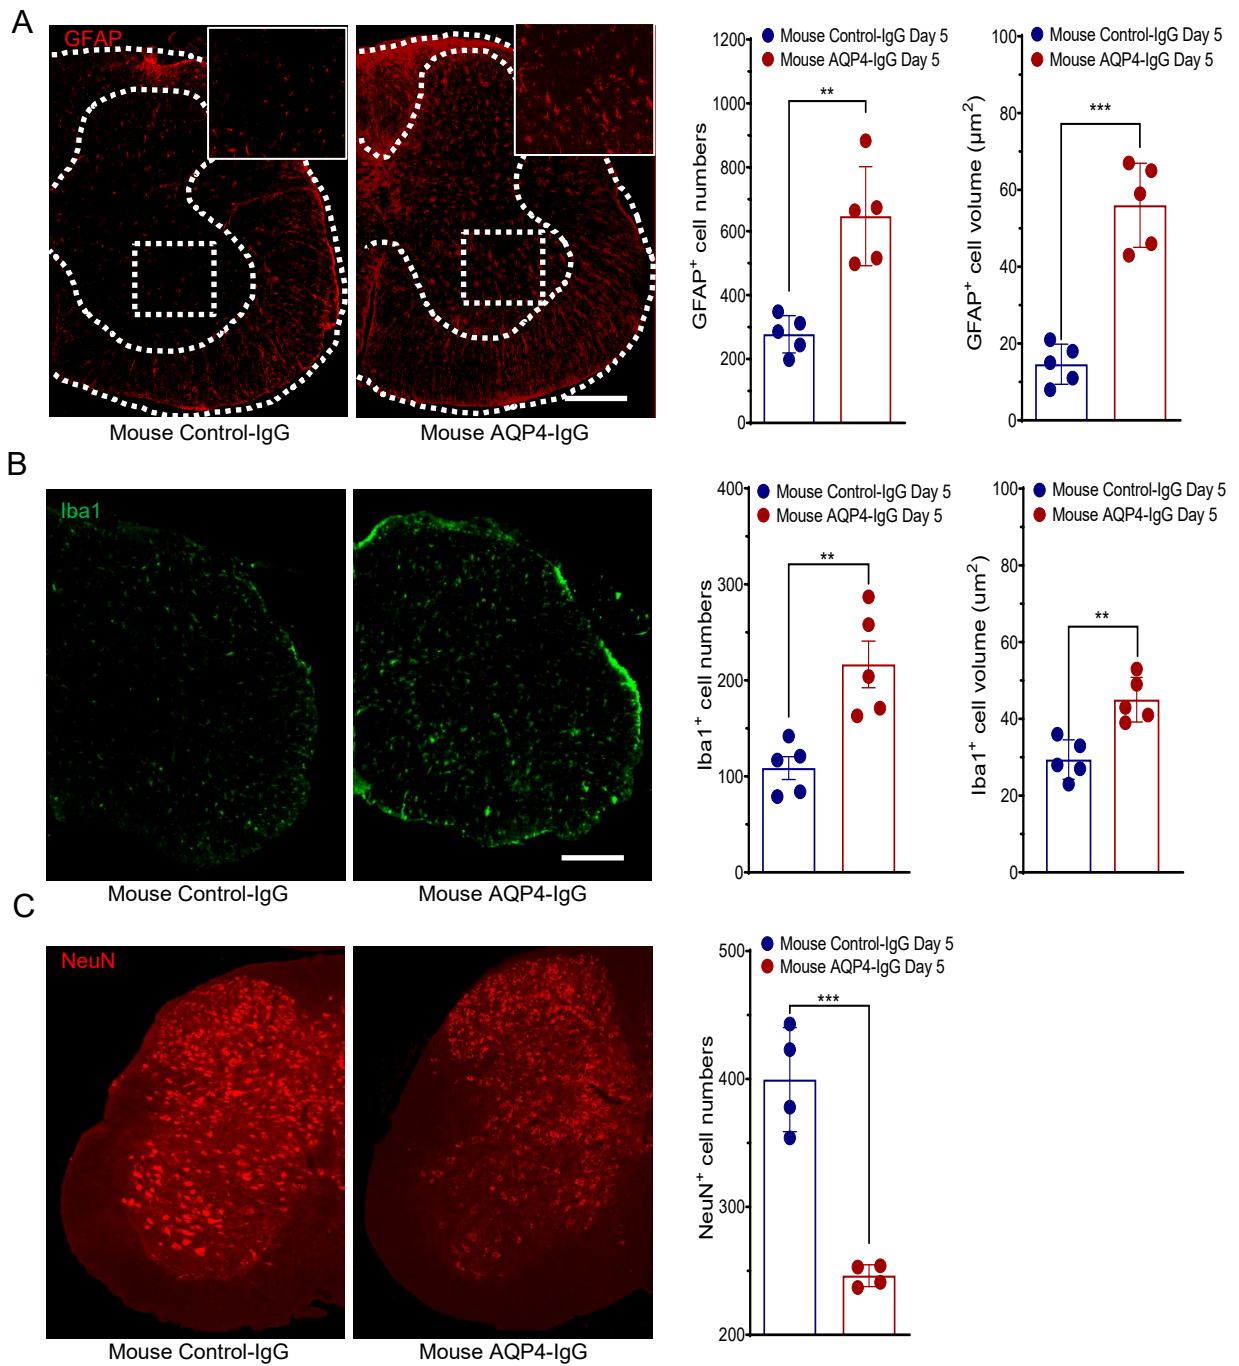

**Figure S5. Astrocyte activation by mouse monoclonal AQP4-IgG leads to microglial activation and loss of neuronal NeuN.**

Representative spinal L4 cross sections on day 5 of intrathecal IgG infusion (mouse control-IgG [left] or mouse monoclonal AQP4-IgG [right]) show (A) GFAP immunoreactivity; insets are higher magnifications of boxed areas in ventral horn. Bar graphs show that astrocyte relative numbers (left) and soma volumes (right) are both

significantly greater in AQP4-IgG recipient mice than in control-IgG recipients, n = 5 mice (4 sections/mouse). Scale bar, 200  $\mu$ m. **(B)** Iba1 immunoreactivity. Bar graphs show that microglia relative numbers (left) and soma volumes (right) are both significantly greater in AQP4-IgG recipient mice than in control-IgG recipients, n = 5 mice (4 sections/mouse). Scale bar, 200  $\mu$ m. **(C)** NeuN immunoreactivity. Bar graph shows that NeuN<sup>+</sup> cells are significantly fewer in AQP4-IgG recipient mice than in control-IgG recipients, n = 4 mice (4 sections/mouse). Scale bar, 200  $\mu$ m. Data represent mean  $\pm$  SEM, 2-tailed student's *t*-test **(A-C)**. \*\*P<0.01, \*\*\* P < 0.001.



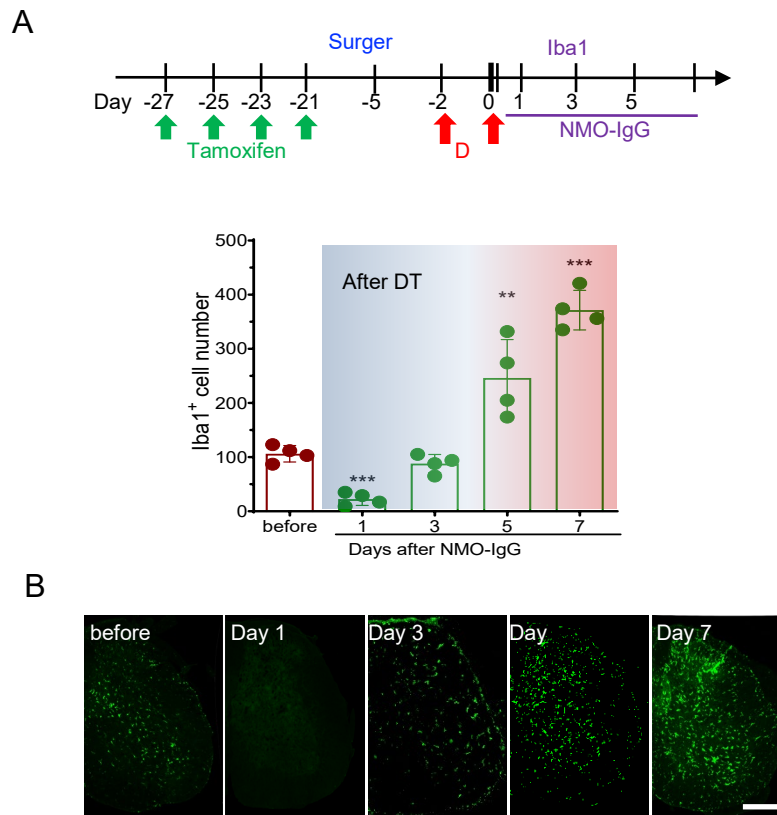

**Figure S6. Time course of microglia depletion and replenishment after NMO-IgG infusion.**

(A) (upper) Tamoxifen and diphtheria toxin (DT) were both injected *i.p.* starting, respectively, 1 month and 48 hours before continuous intrathecal IgG infusion began; mice were killed daily thereafter to enumerate L4 spinal cord microglia. (lower) Microglial numbers (Iba1<sup>+</sup>) following DT administration and NMO-IgG infusion,  $n = 4$  in each group. (B) Representative serial images of Iba<sup>+</sup> cells in L4 spinal cord cross sections, before and after diphtheria toxin administration,  $n = 4$  mice (4 sections/mouse). Scale bar, 200  $\mu\text{m}$ . Data represent mean  $\pm$  SEM, one-way ANOVA (A). \*\*\*  $P < 0.001$ , \*\*  $P < 0.01$ .

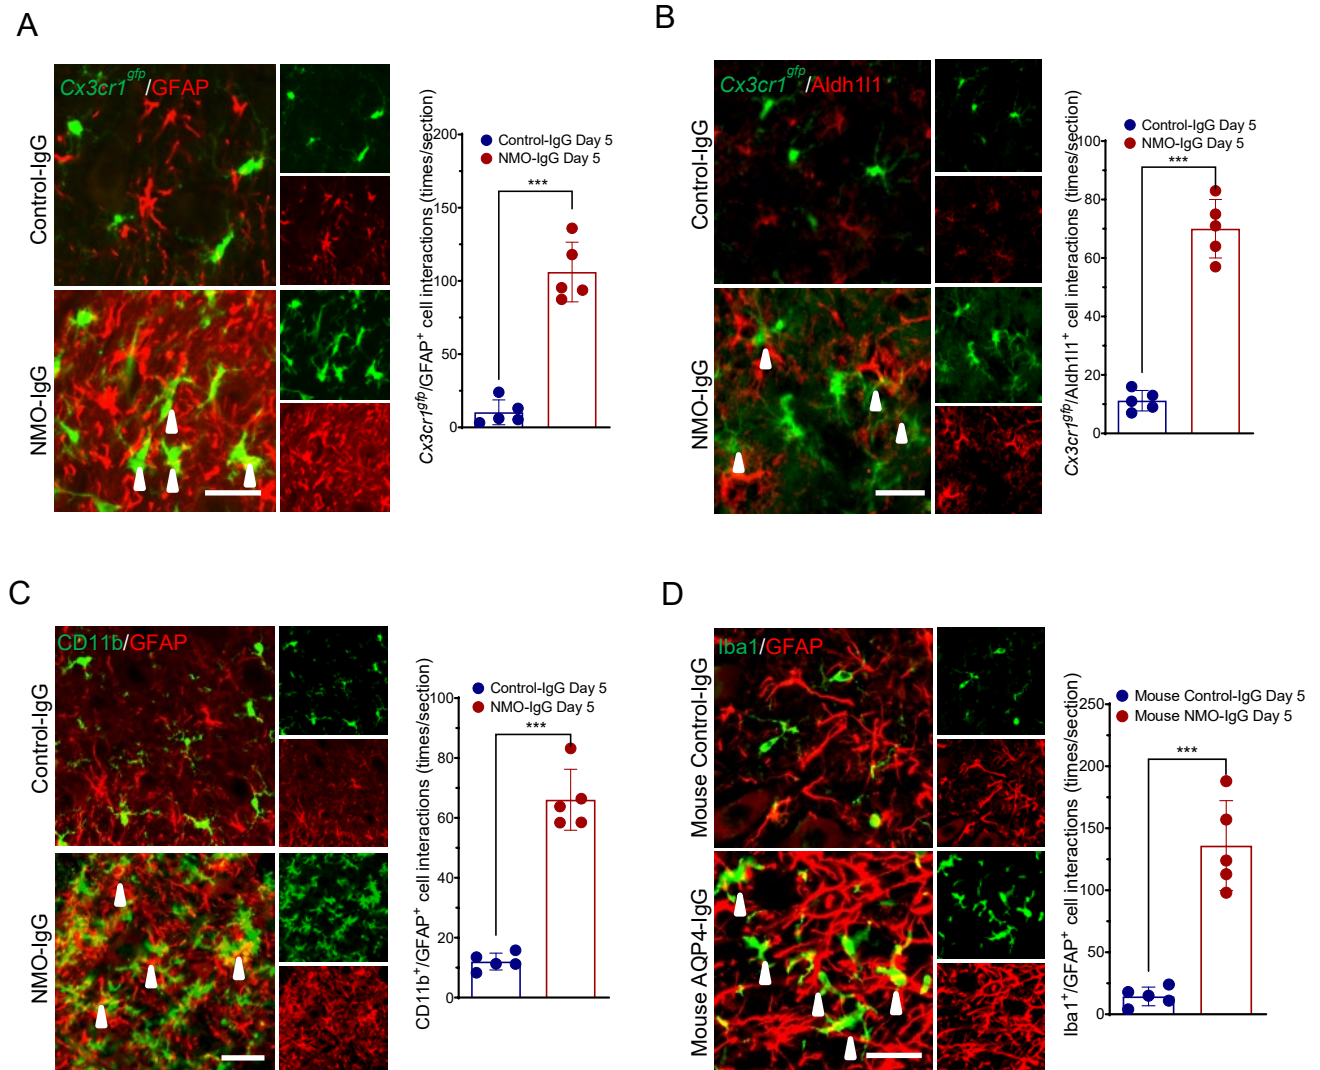

**Figure S7. NMO-IgG induces astrocyte-microglia interactions.**

(A) Interaction of *Cx3cr1<sup>gfp/+</sup>* microglia (green) and GFAP<sup>+</sup> astrocytes (red) is inferred from enlargement and overlapping of both cell types and their processes in dual immunostained L4 spinal cord of NMO-IgG-recipient mice compared with control-IgG recipients. Overlapping events quantified by ImageJ software, n = 5 mice (4 sections/mouse). Scale bar, 20 μm. (B) Representative images and bar graph quantification show interaction between *Cx3cr1<sup>gfp/+</sup>* microglia and Aldh111<sup>+</sup> (red)

astrocytes in NMO-IgG and control-IgG recipients, n = 5 mice (4 sections/mouse). Scale bar, 20  $\mu\text{m}$ . (C) Astrocyte-microglia interaction was further confirmed by dual staining of CD11b<sup>+</sup> microglia (green) and GFAP<sup>+</sup> astrocytes (red), n = 5 mice (4 sections/mouse). Scale bar, 20  $\mu\text{m}$ . (D) Mouse monoclonal AQP4-IgG, but not control-IgG, induced microglia-astrocyte interaction. Arrow heads indicate apparent overlaps of microglia and astrocytes, n = 5 mice (4 sections/mouse). Scale bar, 20  $\mu\text{m}$ . Data represent mean  $\pm$  SEM, 2-tailed student's *t*-test (A-D). \*\*\* P < 0.001.

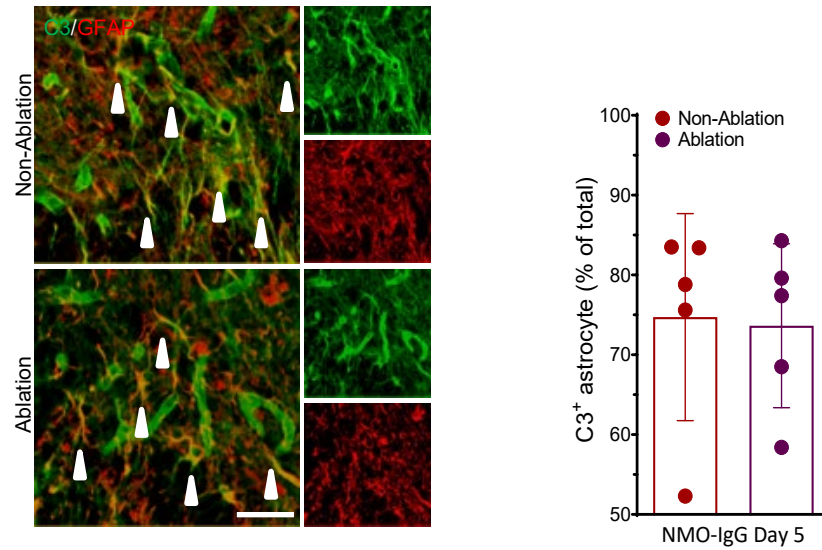

**Figure S8. Genetic ablation of microglia did not prevent NMO-IgG-induced upregulation of astrocytic C3.**

Dual staining reveals complement C3 (green) and GFAP (red) immunoreactivities in astrocytes of L4 spinal cord of mice at day 5 of NMO-IgG infusion, with and without microglia ablation. Arrow heads indicate co-localization of C3 and GFAP immunostaining. Scale bar, 20  $\mu$ m. Bar graph quantifies C3<sup>+</sup> astrocytes in both ablation and non-ablation groups after NMO-IgG infusion, n = 5 mice (4 sections/mouse). Data represent mean  $\pm$  SEM, 2-tailed student's *t*-test.

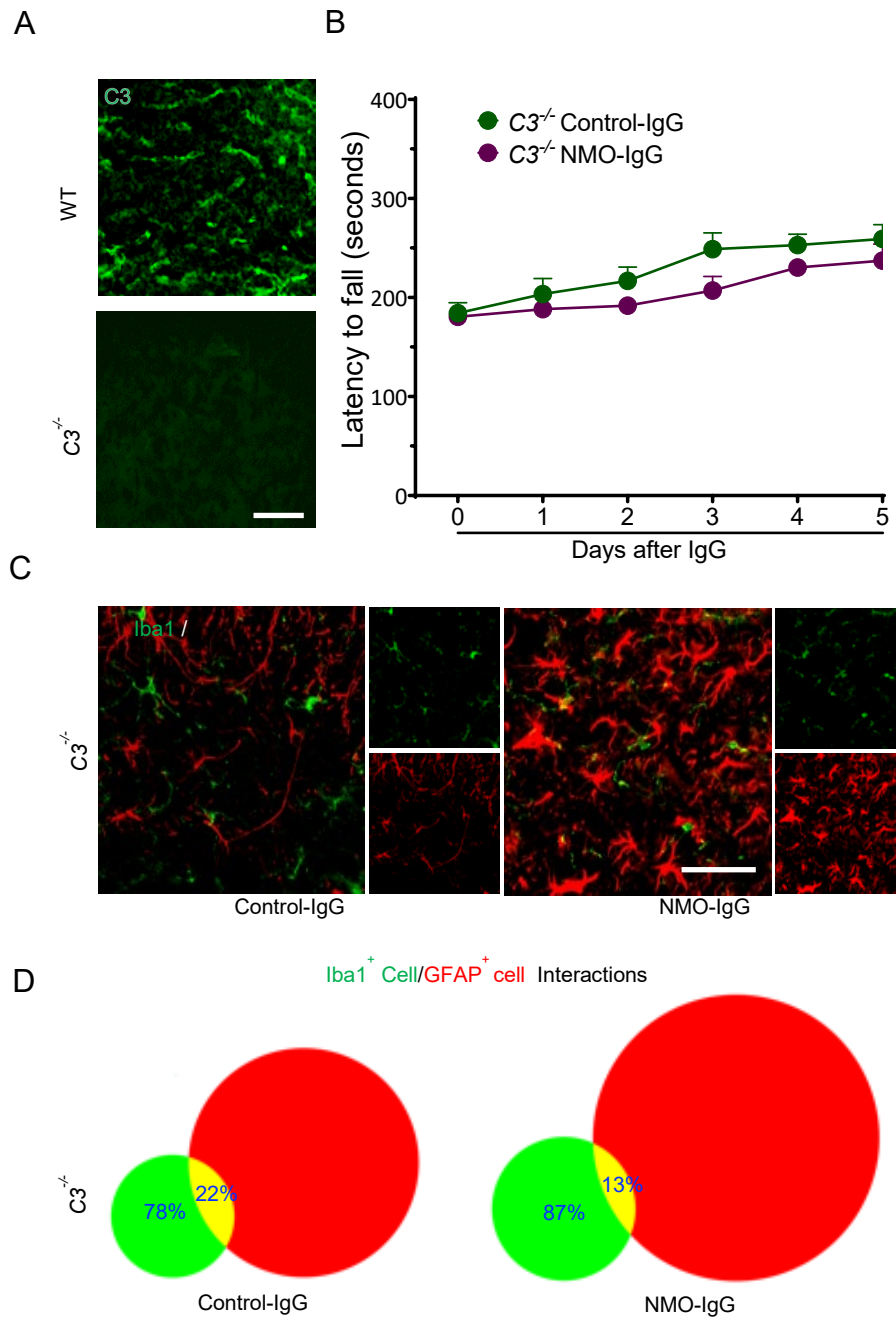

**Figure S9. Signaling by early complement components is critical for initial NMO-IgG-induced motor impairment and progression of pathology.**

(A) Spinal cord tissue of C3-null mice lacks C3 immunoreactivity (green) by comparison with wild-type mice,  $n = 4$  mice (4 sections/mouse). Scale bar, 20  $\mu\text{m}$ . (B)

Intrathecally-infused NMO-IgG did not significantly impair Rotarod performance of C3-null mice, n = 4 mice per group. **(C)** By comparison with control-IgG infusion, microglia (Iba1<sup>+</sup> cells) in L4 spinal cord of C3-null mice show no significant activation after NMO-IgG infusion, despite evidence of astrocyte activation (enlarged GFAP<sup>+</sup> cells), n = 4 mice (4 sections/mouse). Scale bar, 20 μm. **(D)** Microglia-astrocyte interaction events were quantified by ImageJ at day 5 of IgG infusion, n = 4 mice (4 sections/mouse). Data represent mean ± SEM, Two-way ANOVA **(B)**.

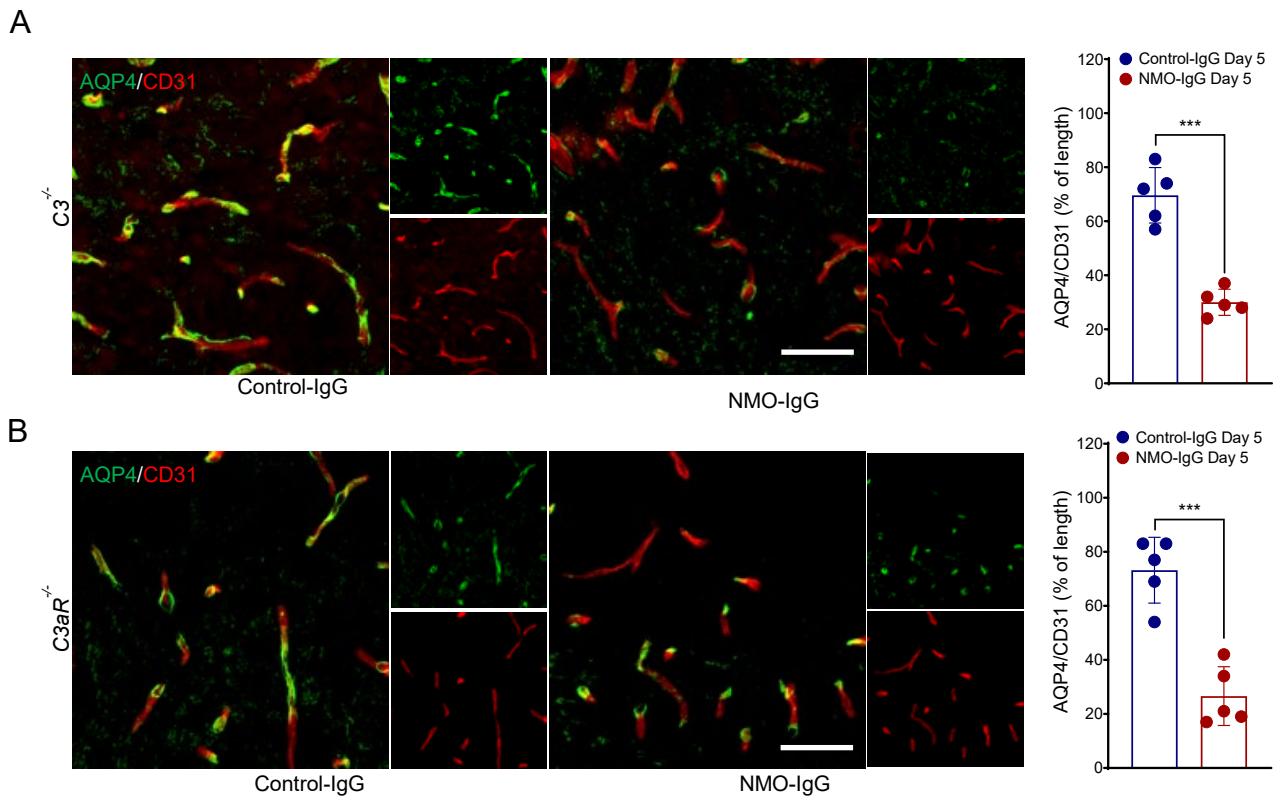

**Figure S10. AQP4 is lost in both C3-null and C3aR-null mice after NMO-IgG infusion.**

Representative images show astrocytic AQP4 (green) and endothelial CD31 (red) immunoreactivities after control-IgG (upper) or NMO-IgG (lower) in L4 spinal cord of mice lacking C3 (**A**) or C3a receptor (**B**),  $n = 4$  mice in each group (4 sections/mouse). Scale bar, 20  $\mu\text{m}$ . Bar graphs quantify the coverage of intraspinal blood vessels by AQP4,  $n = 4$  mice (4 sections/mouse). Data represent mean  $\pm$  SEM, 2-tailed student's  $t$ -test (**A-B**). \*\*\* $P < 0.001$ .
